# Supplementary material
Source: PubMed Central journal article supplement (PMC2656152)
Supplement: 0806427106_0806427106SI.pdf [file 0806427106_0806427106SI.pdf]

# Supporting Information

Wang et al. 10.1073/pnas.0806427106

## SI Text

**SI Methods.** Method of frequent-pattern mining (1, 2).

Table S1 is an example for the transaction database, DB, in which the minimum support threshold is 3.

First, a scan of DB derives a list of frequent items,  $(F:4)$ ,  $(C:4)$ ,  $(A:3)$ ,  $(B:3)$ ,  $(M:3)$  (the number after the colon indicates the support), in which items are ordered in frequency-descending order.

Second, the root of a tree is created and labeled with “null.” The FP-tree is constructed as follows by scanning the transaction database DB the second time.

1. The scan of the first transaction leads to the construction of the first branch of the tree:  $\langle(F:1), (C:1), (A:1), (M:1)\rangle$ . Notice that the frequent items in the transaction are listed according to the order in the list of frequent items.

2. For the second transaction, since its (ordered) frequent item list  $\langle F, C, A, B, M\rangle$  shares a common prefix  $\langle F, C, A\rangle$  with the existing path  $\langle F, C, A, M\rangle$ , the count of each node along the prefix is incremented by 1, and 1 new node  $(B:1)$  is created and linked as a child of  $(A:2)$  and another new node  $(M:1)$  is created and linked as the child of  $(B:1)$ .

3. For the third transaction, since its frequent item list  $\langle F, B\rangle$  shares only the node  $\langle F\rangle$  with the F-prefix subtree,  $F$ 's count is incremented by 1, and a new node  $(B:1)$  is created and linked as a child of  $(F:3)$ .

4. The scan of the 4th transaction leads to the construction of the second branch of the tree,  $\langle(C:1), (B:1)\rangle$ .

5. For the last transaction, since its frequent item list  $\langle F, C, A, M\rangle$  is identical to the first one, the path is shared with the count of each node along the path incremented by 1.

To facilitate tree traversal, an item header table is built in which each item points to its first occurrence in the tree via a node-link. Nodes with the same item-name are linked in sequence via such node-links. After scanning all of the transactions, the tree, together with the associated node-links, are shown in Fig. S1.

**Bayesian network method.** Bayesian network (BN) provides a tool for representing joint probability distributions of many random variables. It is particularly effective in domains where the interactions between variables are fairly local: each variable directly depends on a small set of other variables. Bayesian networks have been applied extensively for modeling complex domains in different fields. This success is due both to the flexibility of the models and to the naturalness of incorporating expert knowledge into the domains (3).

A Bayesian network, also called causal network, consists of the following:

1. A set of variables and a set of directed edges between variables.
2. Each variable has a finite set of directed edges between variables.
3. The variables together with the directed edges form a directed acyclic graph (DAG).
4. To each variable  $A$  with parents  $B_1, \dots, B_n$ , there is attached the potential table  $P(A|B_1, \dots, B_n)$ .

A Bayesian network must have 2 parts. One of them is directed acyclic graph  $G$  composed of  $k$  nodes, and the other is one conditional probability table (CPT) (4). Conditional probability could be expressed in  $P(V_i|\Pi(V_i))$ , to represent relationship of nodes and their parents. Probabilities of the nodes with no parents are defined to transcendental probability. A united

probability could be expressed according to a conditional probability chain. The common format is:

$$P(V_1, V_2, \dots, V_k) = \prod_{i=1}^k P(V_i|V_{i-1} \dots V_1) \quad [1]$$

From the transcendental probability, according to Bayesian rules, one can calculate the distribution of conditional probability of nodes we are interested in. In theory, given the complete united probability function of a random variable, any lower-order united probability could be computed according to the following format (5–7):

$$P(V_1, V_2, \dots, V_6) = \prod_{i=1}^6 P(V_i|\Pi(V_i)) = P(V_6|V_5)P(V_5|V_2, V_3)P(V_4|V_2)P(V_3|V_1)P(V_2|V_1)P(V_1) \quad [2]$$

**Logistic regression.** Denote the gold standards by random variable  $Y$  and the other genomic features by  $X_1, X_2, \dots, X_n$ . Let  $Y = 1$  when 2 proteins interact, i.e., they are in the same complex, and  $Y = 0$  when the 2 proteins do not interact with each other. The logistic model is of the form equation (3) where the random vector  $X$  consists of  $X_1, X_2, \dots, X_n$  and their interaction terms (8).

$$\log \frac{Pr(Y = 1)}{1 - Pr(Y = 1)} = \alpha + \beta X \quad [3]$$

**ROC curve analysis.** Receiving operator characteristic (ROC) curve is a graphical representation used to assess the discriminatory ability of a dichotomous classifier by showing the tradeoffs between sensitivity and specificity. Sensitivity is calculated by dividing the number of true positives (TP) through the number of all positives, which equals the sum of the true positives and the false negatives (FN); specificity is calculated by dividing the number of true negatives (TN) through the number of all negatives, which equals the sum of the true negatives and the false positives (FP).

$$\text{Sensitivity} = TP/(TP + FN), \text{ Specificity} = TN/(TN + FP) \quad [4]$$

The ROC plot shows specificity on the  $x$  axis and sensitivity on the  $y$  axis. A good classifier has its ROC curve climbing rapidly toward upper left hand corner of the graph. This can also be quantified by measuring the area under the curve. The closer the area is to 1.0, the better the classifier is; and the closer the area is to 0.5, the worse the classifier is (8).

**KS analysis.** Komogorov and Smirnov Statistics is a statistical measure of the discriminations or classifications of one group with another. If we divide the samples into 2 populations, one good and one bad, then KS is defined as the percentage of accumulations of good populations subtracts the percentage of accumulated bad populations (at specific bins or intervals).

$$KS = |\%accumulated_{negativepopulations} - \%accumulated_{positivepopulations}| \quad [5]$$

If the KS values is closer to 1, the discrimination is strong and there is a clear way to distinguish good populations with bad populations. If the KS value is closer to 0, there is no discrimination. There is no statistical way of differentiate the good

populations with bad ones. KS value provides a quantitative measure of the discrimination or the performance of the classification.

#### SI Results. Comparison of different method.

$$p(o/m, g, s, p, r) = \frac{p(p/s, o)p(s/m, g, o)p(o/m, g)p(r/m, s, o)}{\sum_o p(p/s, o)p(s/m, g, o)p(o/m, g)p(r/m, s, o)} \quad [6]$$

We got the prediction graph as shown in Fig. S2B (4). In the mean time, the conditional probability table is obtained. Therefore, according to the formula (1), we can obtain the predicted results and compare its performance with FPT. In the equation (1), o,m,g,s,p,r separately represent variable output,mips,go,e-s,exp,expr in the Fig. S2B.

**Add new features.** Fig. S3 shows the roc curve comparisons of 5 features and 13 features, and Fig. S4 a and b shows the KS value comparisons of 5 features and 13 features. From the results we can see that integrating 13 features performs a little better than 5 features. Fig. S5 shows the roc curve comparisons of 4 different methods for 13 features. The results of ROC curve shows that Bayesian network method performs badly when using 13 features. It is probably because Bayesian network method encounters difficulties when used to create too many nodes network. In the meantime, FPT performs a little better than logistic regression and much better than SNB in both training and testing samples as illustrated in Fig. S5. Therefore, we further compare KS values of FPT and logistic regression method in Fig. S4 c and d. The KS values show that FPT does better when hit rate is between 0.5 and 0.8 whereas logistic regression performs better when hit rate is >0.8. Our goal here is to predict whether there are interactions between 2 proteins, and 0.5 should be an appropriate cut, so FPT is a more useful approach. Finally, we also compare their correct prediction rates when hit rate is 0.5. Fig. S6 shows that FPT predicts more accurately. This supports our conclusion that FPT is a better predictor among all of the other methods included.

**Protein-protein interactions in 26S proteasome complex and cytoplasmic ribosome complex.** Figs. S7 and S8 are illustrations of protein-protein interactions predicted by mFPT. As we can see mFPT predict more proteins than SNB for 26S proteasome complex and cytoplasmic ribosome complex. See also Table S3 and S4. (blue nodes represent proteins that mFPT and SNB both predict, cyan nodes represent proteins mFPT predict while SNB do not).

For 26S proteasome complex, mFPT predicts 29 proteins more than SNB's 13 proteins, and database search tells us that these newly predicted proteins all belong to 26S proteasome or

20S proteasome, which are associated to 26S proteasome. See Fig. S7 and Table S3.

Among these newly predicted proteins, YDL147W, YDR427W, YFR004W YFR010W, YGL011C, YGR232W, YHR200W, YOR117W, YOR261C, YPR108W are regulatory particles of 26S proteasome, YER012W, YER094C, YFR050C, YGR135W, YJL001W, YML092C, YMR314W, YOL038W, YOR362C, YPR103W are regulatory particles of 20S proteasome. The proteasome is an essential component of the ATP-dependent proteolytic pathway in eukaryotic cells and is responsible for the degradation of most cellular proteins. The 20S proteasome contains multiple peptidase activities that function through a new type of proteolytic mechanism involving a threonine active site. The 26S complex, which degrades ubiquitinated proteins, contains in addition to the 20S proteasome a 19S regulatory complex composed of multiple ATPases and components necessary for binding protein substrates (9). Therefore, 20S proteasome is naturally associated with 26S complex.

For Cytoplasmic ribosome complex we can see in Table S4 and Fig. S8, mFPT predicts 122 proteins more than SNB's 98 proteins, and in the newly predicted proteins, YDL082W, YMR142C, YHL001W, YMR121C, YNL069C, YNL301C, YGL135W, YBR191W, YHR010W, YDR471W, YFR032CA, YFR031CA, YOR063W, YPL143W, YPL249CA, YBR031W are Protein component of the large (60S) ribosomal subunit, YJL191W, YDL083C, YDR450W, YKR057W, YLR367W, YPR132W, YLR287CA, YPL081W are protein component of the small (40S) ribosomal subunit. YDL130W is Ribosomal protein P1 beta. YDL208W is Nuclear protein related to mammalian high mobility group (HMG) proteins (9).

Ribosomes are highly conserved large ribonucleoprotein (RNP) particles, consisting in yeast of a large 60S subunit and a small 40S subunit, that perform protein synthesis. The 60S subunit contains 42 proteins and 3 RNA molecules. The 40S subunit has a single 18S RNA of 1798 nt (Nucleic Length) and 32 proteins (11). These two kinds of proteins that we found all belong to ribosome proteins.

**Tables of FPT trees example and proteins in each protein-protein interaction complex.** In Table S1.1, we listed the FPT tree examples. In Table S1.2, we listed proteins predicted in Mitochondrial ribosome complex. In Table S1.3, we listed proteins predicted in 26S complex. In Table S1.4, we listed proteins predicted in Cytoplasmic ribosome complex. In Table S1.5, we listed proteins predicted in new complex with biological function of premRNA splicing. The tables are predictions with both FPT and SNB methods. 1 means there are interactions and 0 means there are no interactions. The name of the proteins and the associated biological functions are listed too.

- Han J, Pei J, Yin Y, Mao R (2004) Mining Frequent Patterns without Candidate Generation: A Frequent-Pattern Tree Approach. *Data Mining and Knowledge Discovery* 8:53–87.
- Han J, Pei J (2000) Mining Frequent Patterns by Pattern-Growth: Methodology and Implications. *ACM SIGKDD Explorations Newsletter* 2:14–20.
- Nachman I (2004) Probabilistic Modeling of Gene Regulatory Networks From Data. Ph.D. dissertation, Heberw University.
- Chen XQ (2004) A data mining technology based on bayesian network. *Journal of Sanming College* 21:47–52.
- Stephenson TA (2000) An introduction to Bayesian network theory and usage. <http://www.idiap.ch/publications/todd00a.bib.abs.html>
- Friedman N, Koller D (2003) Being Bayesian about Network Structure: A Bayesian Approach to Structure Discovery in Bayesian Networks. *Machine Learning* 50:95–126.
- Friedman N, Linial M, Nachman I, Pe'er D (2000) Using Bayesian Network to Analyze Expression Data. *Computational Biology* 7:601–620.
- Lin N, Wu BL, Jansen R, Gerstein M, Zhao HY (2004) Information assessment on predicting protein-protein interactions. *BMC Bioinformatics* 5:154.
- Coux O, Tanaka K, Goldberg AL (1996) Structure and functions of the 20S and 26S proteasomes. *Annu Rev Biochem* 65:801–847.
- Venema J, Tollervey D (1999) Ribosome synthesis in *Saccharomyces cerevisiae*. *Annu Rev Genet* 33:261–311.
- Verschoor 1998 Verschoor A, et al. (1998) Three-dimensional structure of the yeast ribosome. *Nucleic Acids Res* 26:655–661.

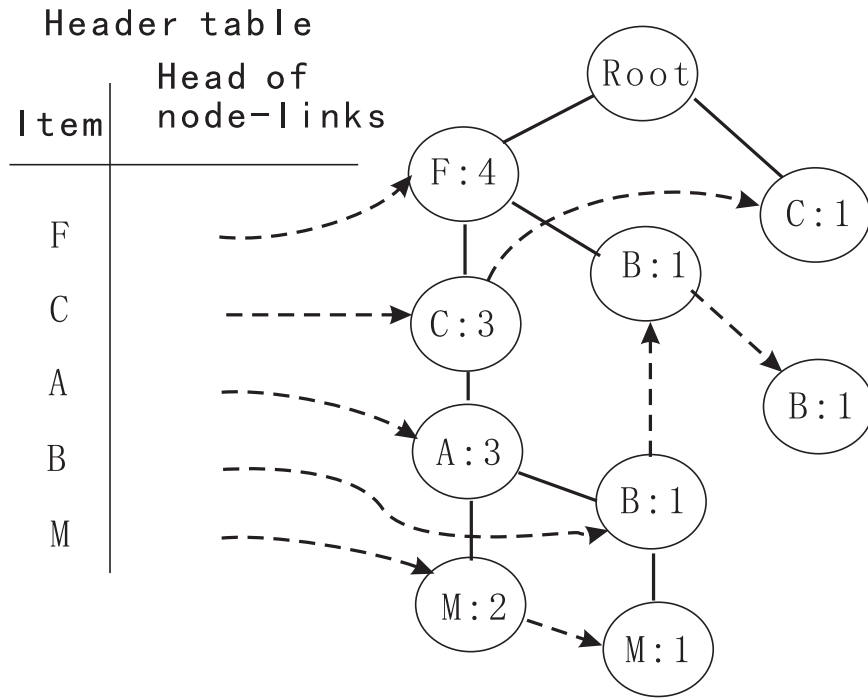

Fig. S1. The FP-tree in Example 1

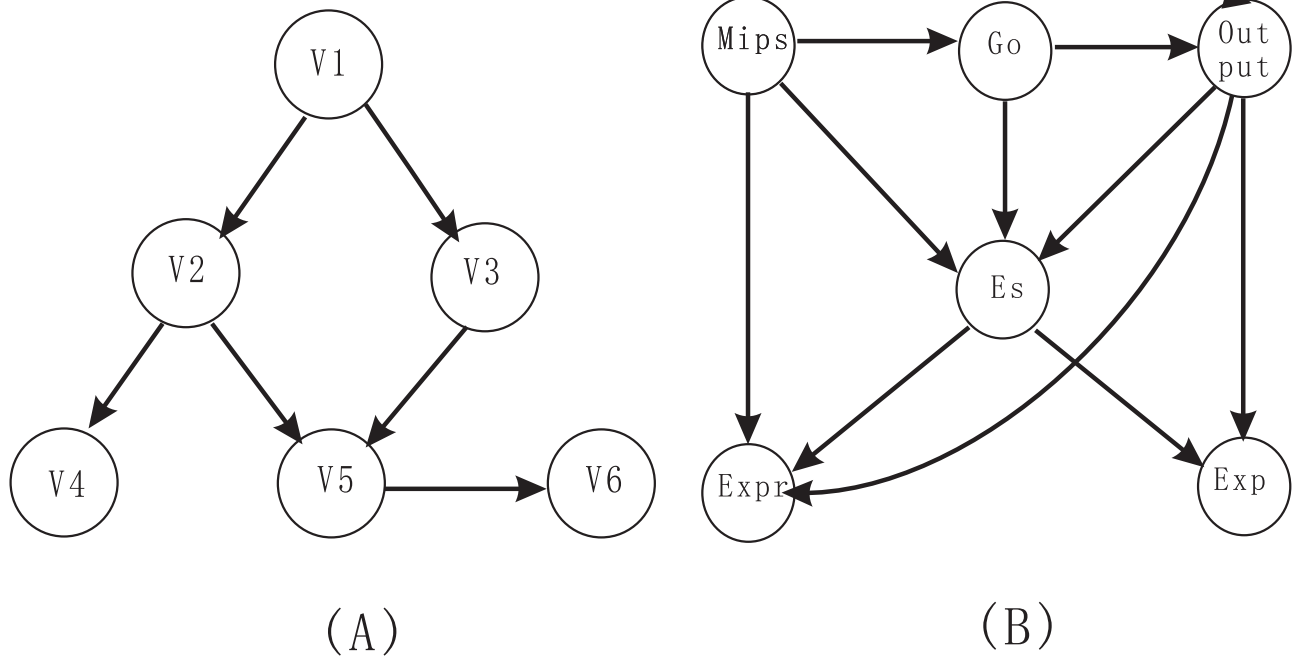

Fig. S2. Bayesian network graph (A), and Bayesian network graph of predicting results (B).

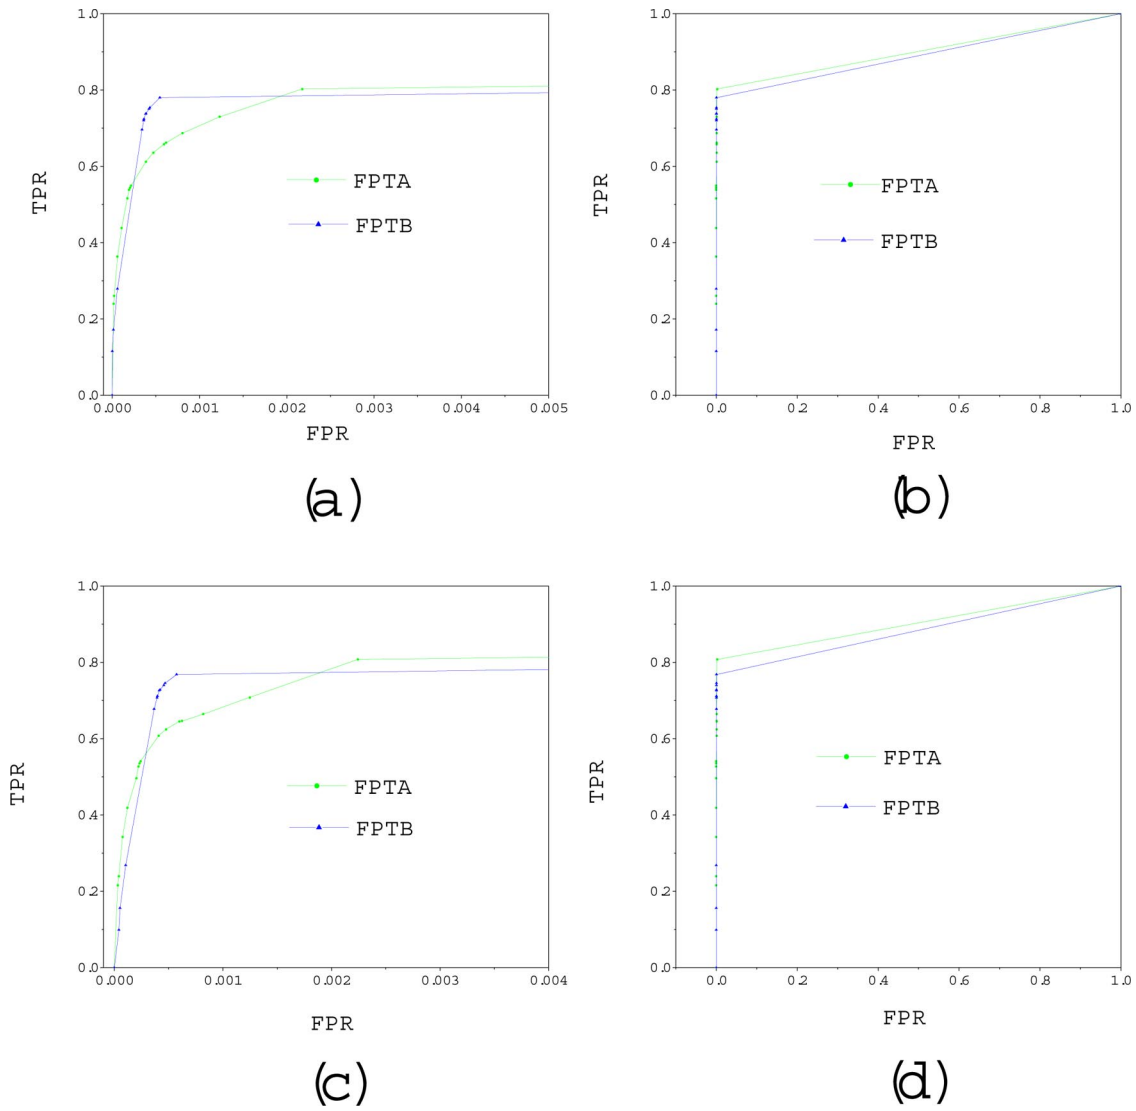

**Fig. S3.** (a and b) Roc curve comparisons of 5 features and 13 features for training sample. (c and d) Roc curve comparisons of 5 features and 13 features for testing sample.

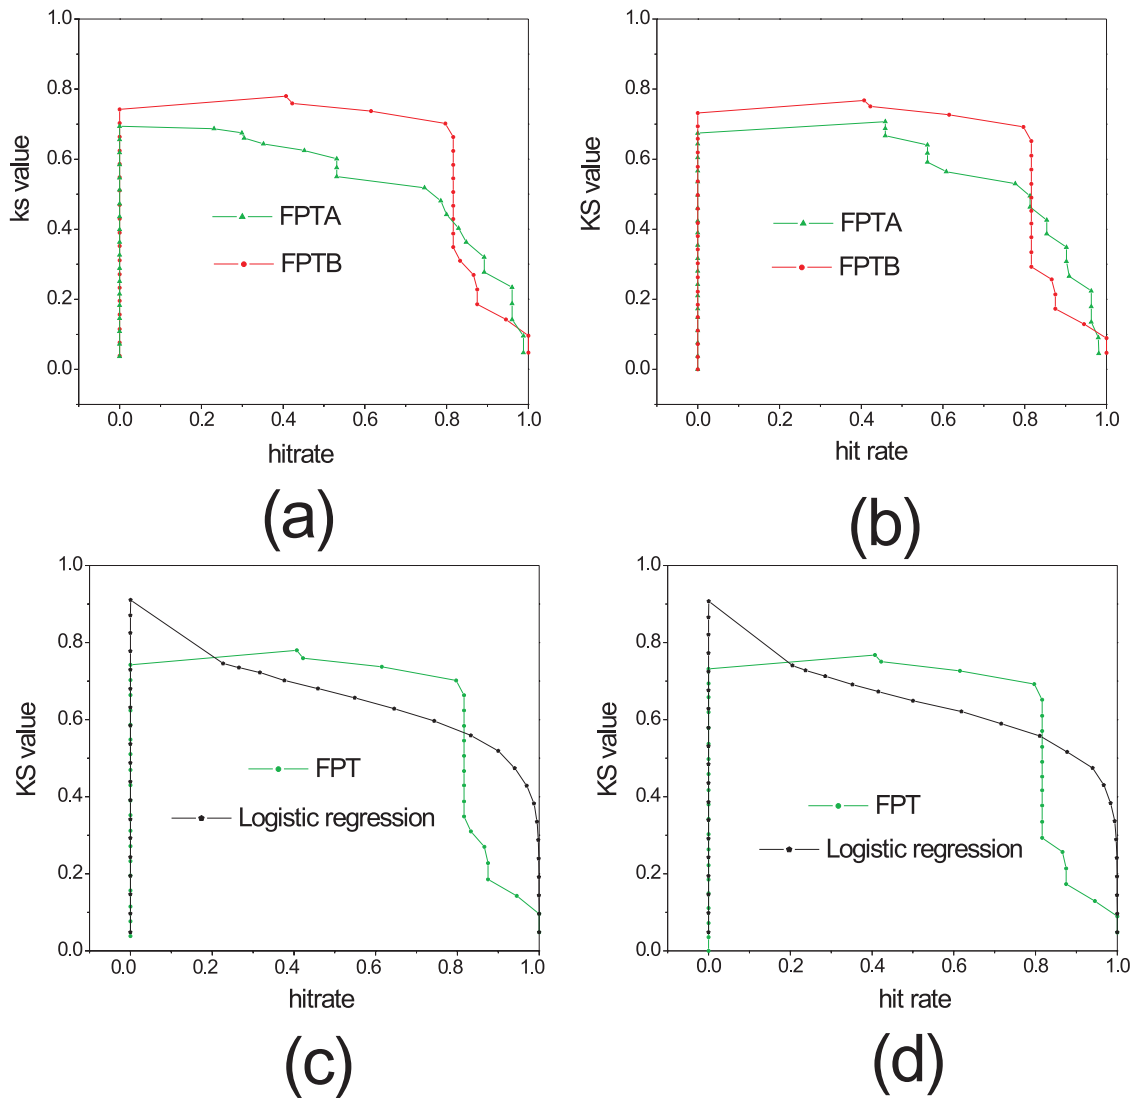

**Fig. S4.** (a and b)KS value comparisons of 5 (a) and 13 (b) features for training (a) and testing (b) samples. (c and d) KS value comparisons of different methods for 13 features, respectively, for training (c) and testing (d) samples.

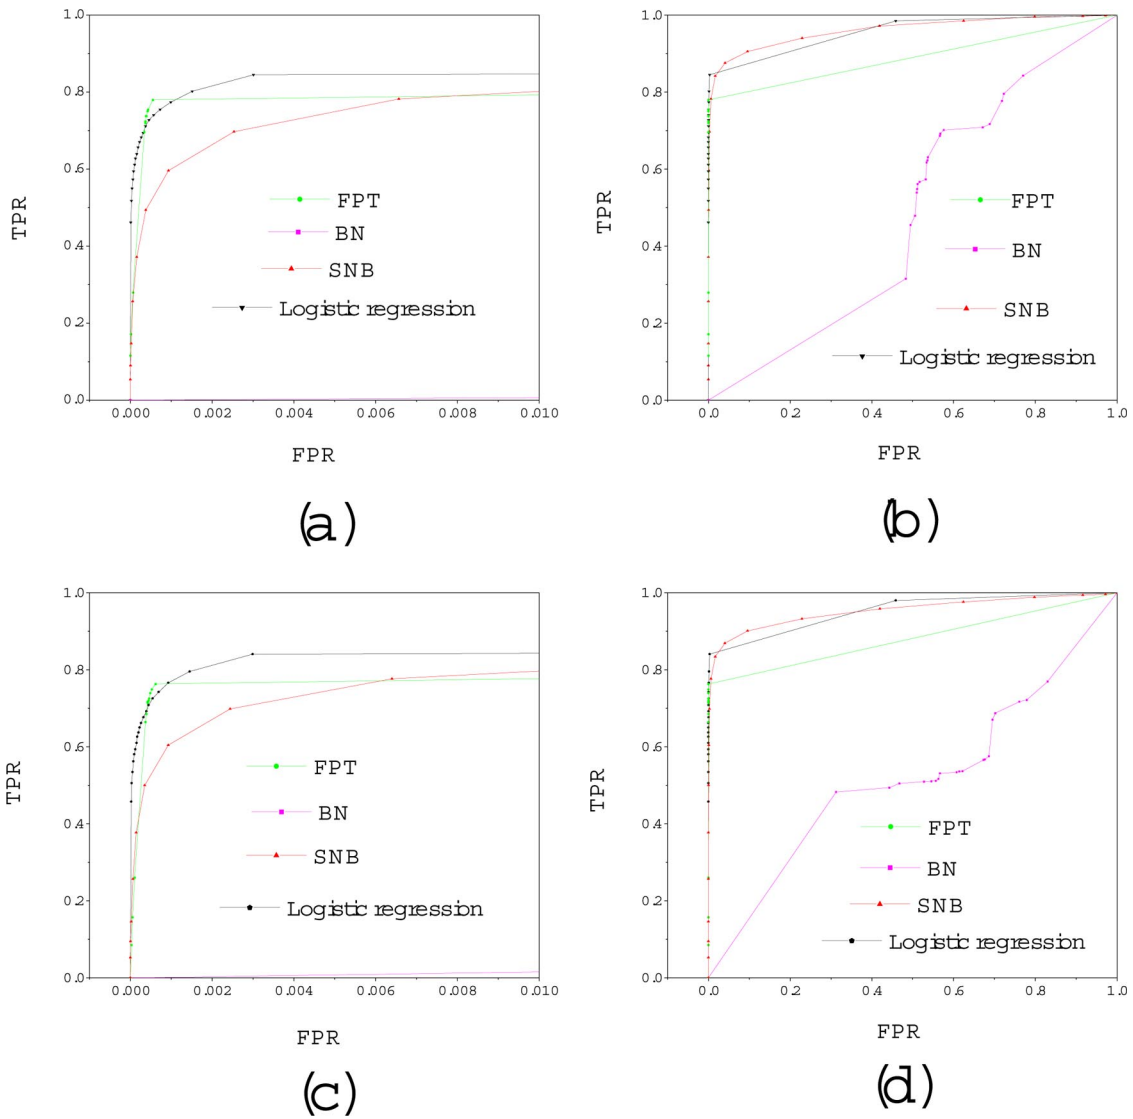

Fig. S5. (a and b) Roc curve comparisons of the training samples for 4 methods for 13 features. (c and d) Roc curve comparisons of the testing samples for 4 methods for 13 features.

### Comparison of correct prediction rate

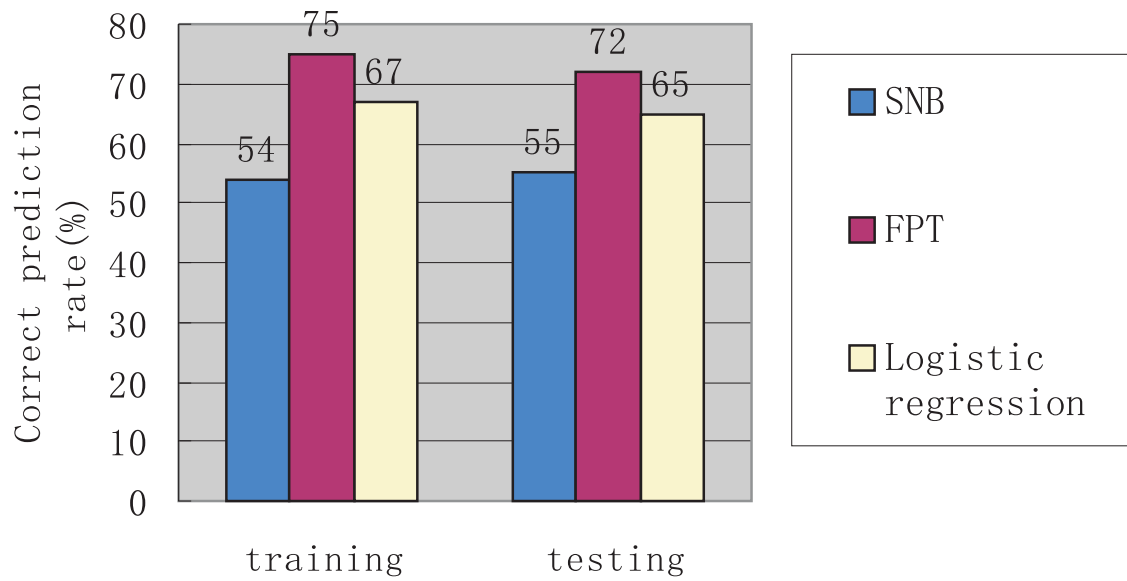

Fig. 56. Comparisons of correct prediction rate for 3 methods for 13 features for both training and testing data samples.



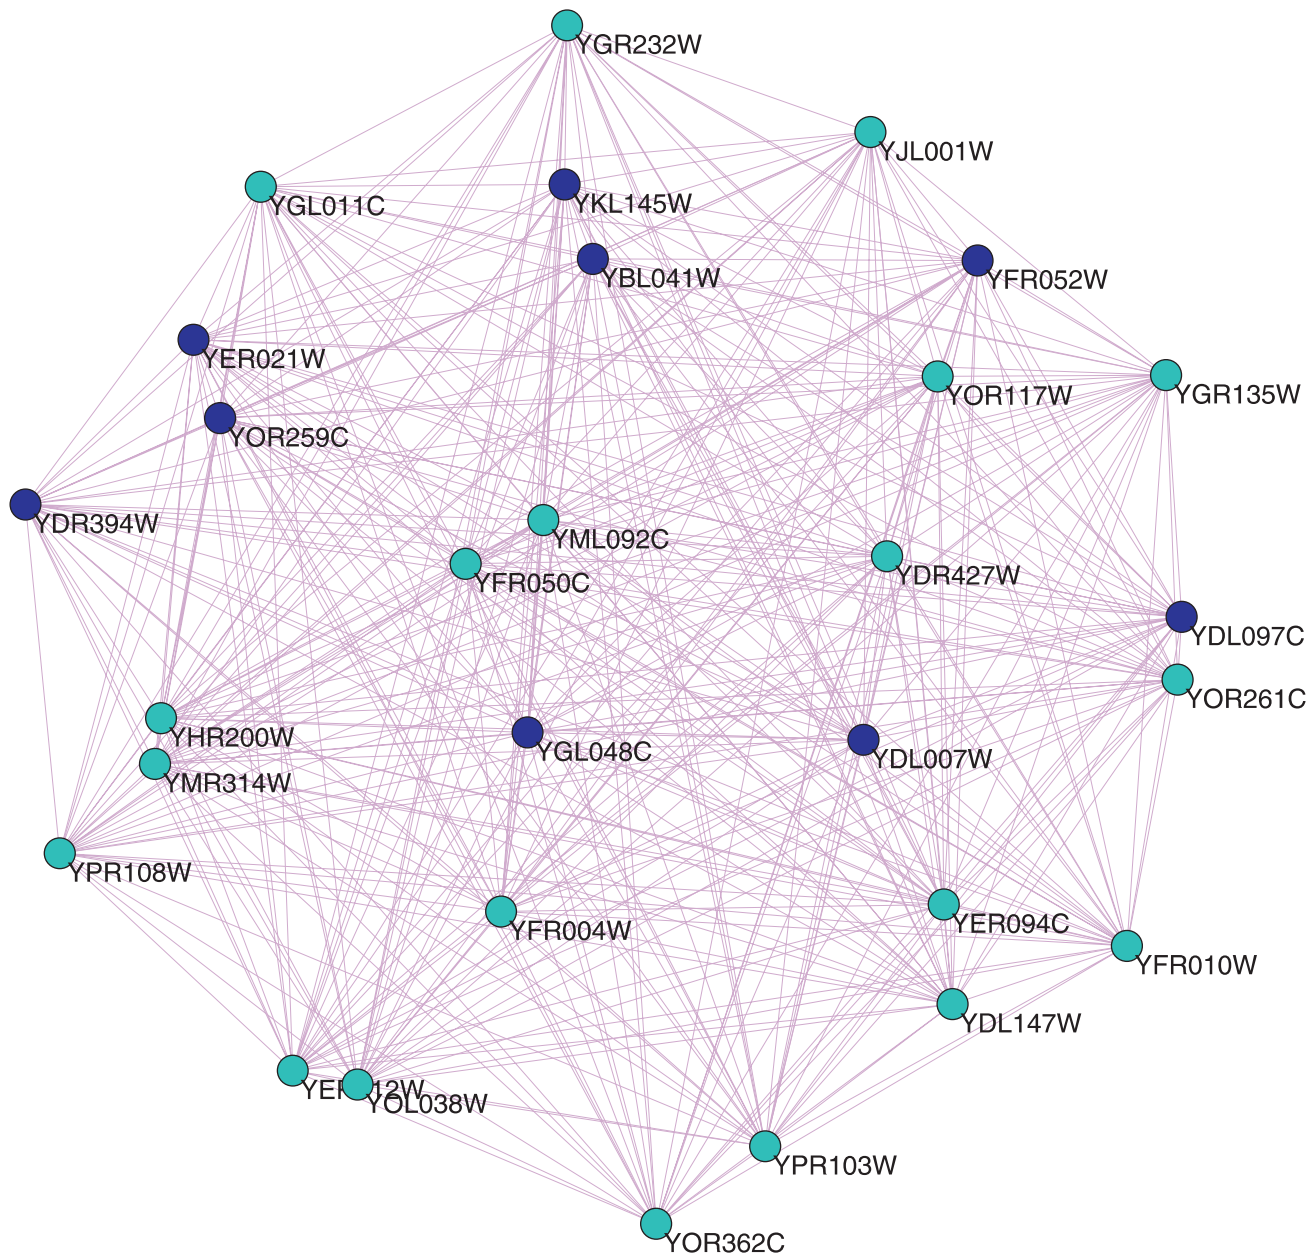

Fig. S7. The 265 proteasome complex.

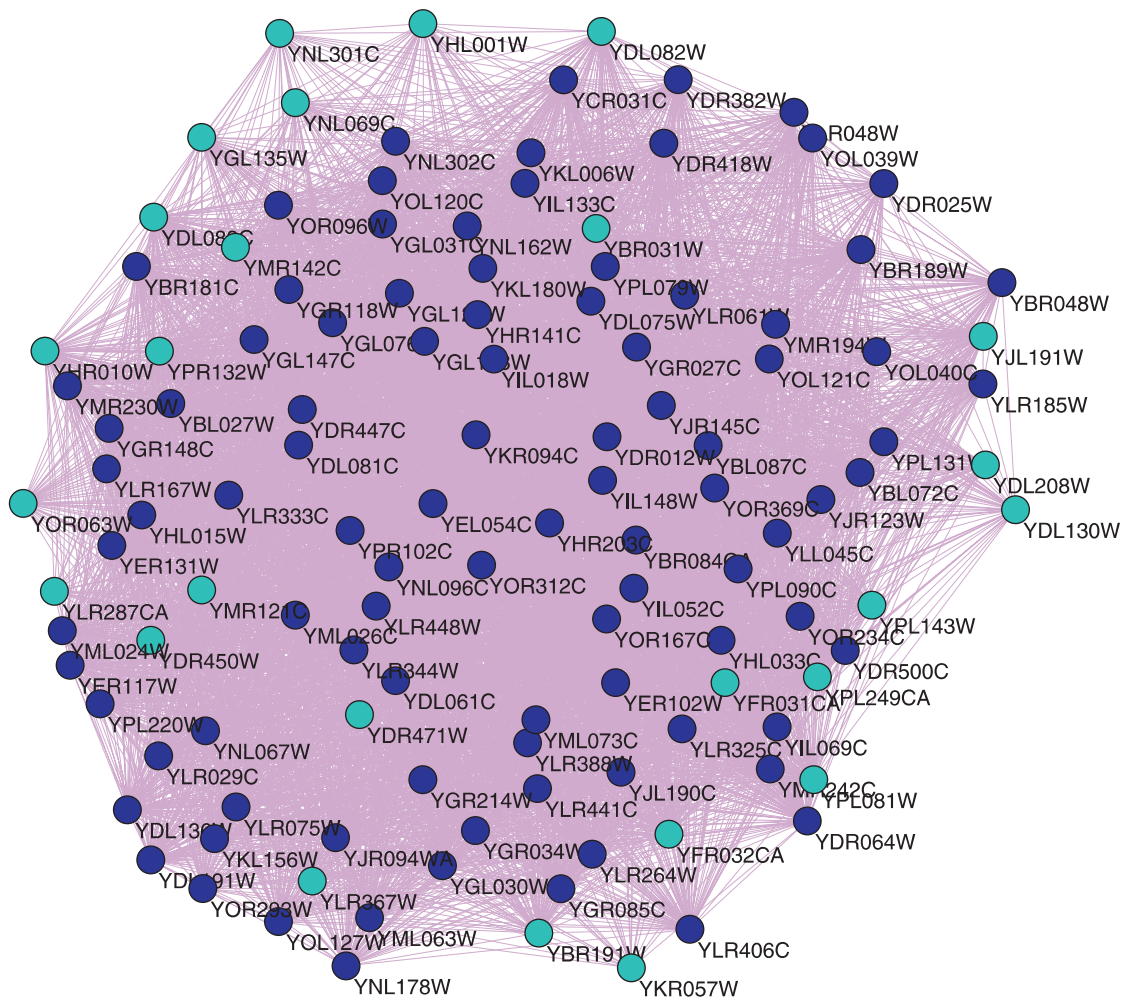

Fig. S8. Cytoplasmic ribosome complex.

**Table S1. The FP-treem Example 1**

| Tid | Items bought               | (Ordered) frequent items |
|-----|----------------------------|--------------------------|
| 1   | <i>F, A, C, D, G, I, M</i> | <i>F, C, A, M</i>        |
| 2   | <i>A, B, C, F, L, M, O</i> | <i>F, C, A, B, M</i>     |
| 3   | <i>B, F, H, J, O</i>       | <i>F, B</i>              |
| 4   | <i>B, C, K, S</i>          | <i>C, B</i>              |
| 5   | <i>A, F, C, E, L, M, N</i> | <i>F, C, A, M</i>        |

**Table S2. Mitochondrial ribosome complex. MRP represents Mitochondrial ribosomal protein**

| Systematic name | Standard name | FPT | SNB | Discription                                 |
|-----------------|---------------|-----|-----|---------------------------------------------|
| YDR115W         | YDR115W       | 1   | 1   | Putative MRPL                               |
| YLR069C         | MEF1          | 1   | 1   | Mitochondrial elongation factor             |
| YBL090W         | MRP21         | 1   | 1   | MRPL                                        |
| YBR146W         | YBR146W       | 1   | 1   | MRPS                                        |
| YBR282W         | MRPL27        | 1   | 1   | MRPL                                        |
| YCR003W         | MRPL32        | 1   | 1   | MRPL                                        |
| YDR116C         | MRPL1         | 1   | 1   | MRPL                                        |
| YDR237W         | MRPL7         | 1   | 1   | MRPL                                        |
| YDR337W         | MRPS28        | 1   | 1   | MRPS                                        |
| YHR147C         | MRPL6         | 1   | 1   | MRPL                                        |
| YJL096W         | MRPL49        | 1   | 1   | MRPL                                        |
| YKL138C         | MRPL31        | 1   | 1   | MRPL                                        |
| YKR006C         | MRPL13        | 1   | 1   | MRPL                                        |
| YKR085C         | MRPL20        | 1   | 1   | MRPL                                        |
| YMR193W         | MRPL24        | 1   | 1   | MRPL                                        |
| YNL252C         | MRPL17        | 1   | 1   | MRPL                                        |
| YNL306W         | MRPL18        | 1   | 1   | MRPL                                        |
| YOR150W         | MRPL23        | 1   | 1   | MRPL                                        |
| YOR158W         | PET123        | 1   | 1   | MRPS                                        |
| YBR024W         | SCO2          | 1   | 0   | Mitochondrial inner membrane protein        |
| YBR120C         | CBP6          | 1   | 0   | Mitochondrial translational activator       |
| YGL143C         | MRF1          | 1   | 0   | Mitochondrial translation release factor    |
| YLR203C         | MSS51         | 1   | 0   | Mitochondrial Splicing Suppressor           |
| YOL023W         | IFM1          | 1   | 0   | Mitochondrial translation initiation factor |
| YPL104W         | MSD1          | 1   | 0   | Mitochondrial aspartyl-tRNA synthetase      |
| YPL183WA        | YPL183W-A     | 1   | 0   | Likely to be a MRP                          |
| YPR047W         | MSF1          | 1   | 0   | Mitochondrial aminoacyl-tRNA Synthetase     |
| YBL038W         | MRPL16        | 1   | 0   | MRPL                                        |
| YBR122C         | MRPL36        | 1   | 0   | MRPL                                        |
| YBR251W         | MRPS5         | 1   | 0   | MRPS                                        |
| YBR268W         | MRPL37        | 1   | 0   | MRPL                                        |
| YCR046C         | IMG1          | 1   | 0   | MRPL                                        |
| YDL045WA        | MRP10         | 1   | 0   | MRPS                                        |
| YDL202W         | MRPL11        | 1   | 0   | MRPL                                        |
| YDR322W         | MRPL35        | 1   | 0   | MRPL                                        |
| YDR347W         | MRP1          | 1   | 0   | MRPS                                        |
| YDR405W         | MRP20         | 1   | 0   | MRPL                                        |
| YDR462W         | MRPL28        | 1   | 0   | MRPL                                        |
| YGR076C         | MRPL25        | 1   | 0   | MRPL                                        |
| YGR084C         | MRP13         | 1   | 0   | MRPS                                        |
| YGR220C         | MRPL9         | 1   | 0   | MRPL                                        |
| YHL004W         | MRP4          | 1   | 0   | MRPS                                        |
| YJL063C         | MRPL8         | 1   | 0   | MRPL                                        |
| YKL167C         | MRP49         | 1   | 0   | MRPL                                        |
| YKL170W         | MRPL38        | 1   | 0   | MRPL                                        |
| YLR312WA        | MRPL15        | 1   | 0   | MRPL                                        |
| YLR439W         | MRPL4         | 1   | 0   | MRPL                                        |
| YML009C         | MRPL39        | 1   | 0   | MRPL                                        |
| YML025C         | YML6          | 1   | 0   | MRPL                                        |
| YMR024W         | MRPL3         | 1   | 0   | MRPL                                        |
| YMR225C         | MRPL44        | 1   | 0   | MRPL                                        |
| YMR257C         | PET111        | 1   | 0   | Mitochondrial translational activator       |
| YNL005C         | MRP7          | 1   | 0   | MRPL                                        |
| YNL137C         | NAM9          | 1   | 0   | MRPS                                        |
| YNL185C         | MRPL19        | 1   | 0   | MRPL                                        |
| YNL284C         | MRPL10        | 1   | 0   | MRPL                                        |
| YNR037C         | RSM19         | 1   | 0   | MRPS                                        |
| YPR166C         | MRP2          | 1   | 0   | MRPS                                        |
| YGL068W         | MNP1          | 0   | 1   | Mitochondrial-Nucleoid Protein              |
| YMR188C         | MRPS17        | 0   | 1   | MRPS                                        |
| YNL081C         | SWS2          | 0   | 1   | Putative MRPS                               |

MRPL, mitochondrial ribosomal protein of the large subunit; MRPS, mitochondrial ribosomal protein of the small subunit.

**Table S3. 26S complex**

| Systematic name | Standard name | FPT | SNB | Discription    |
|-----------------|---------------|-----|-----|----------------|
| YBL041W         | PRE7          | 1   | 1   | 20S proteasome |
| YDL007W         | RPT2          | 1   | 1   | 26S proteasome |
| YDL097C         | RPN6          | 1   | 1   | 26S proteasome |
| YDR394W         | RPT3          | 1   | 1   | 26S proteasome |
| YER021W         | RPN3          | 1   | 1   | 26S proteasome |
| YFR052W         | RPN12         | 1   | 1   | 26S proteasome |
| YGL048C         | RPT6          | 1   | 1   | 26S proteasome |
| YKL145W         | RPT1          | 1   | 1   | 26S proteasome |
| YOR259C         | RPT4          | 1   | 1   | 26S proteasome |
| YDL147W         | RPN5          | 1   | 0   | 26S proteasome |
| YDR427W         | RPN9          | 1   | 0   | 26S proteasome |
| YER012W         | PRE1          | 1   | 0   | 20S proteasome |
| YER094C         | PUP3          | 1   | 0   | 20S proteasome |
| YFR004W         | RPN11         | 1   | 0   | 26S proteasome |
| YFR010W         | UBP6          | 1   | 0   | 26S proteasome |
| YFR050C         | PRE4          | 1   | 0   | 20S proteasome |
| YGL011C         | SCL1          | 1   | 0   | 26S proteasome |
| YGR135W         | PRE9          | 1   | 0   | 20S proteasome |
| YGR232W         | NAS6          | 1   | 0   | 26S proteasome |
| YHR200W         | RPN10         | 1   | 0   | 26S proteasome |
| YJL001W         | PRE3          | 1   | 0   | 20S proteasome |
| YML092C         | PRE8          | 1   | 0   | 20S proteasome |
| YMR314W         | PRE5          | 1   | 0   | 20S proteasome |
| YOL038W         | PRE6          | 1   | 0   | 20S proteasome |
| YOR117W         | RPT5          | 1   | 0   | 26S proteasome |
| YOR261C         | RPN8          | 1   | 0   | 26S proteasome |
| YOR362C         | PRE10         | 1   | 0   | 20S proteasome |
| YPR103W         | PRE2          | 1   | 0   | 20S proteasome |
| YPR108W         | RPN7          | 1   | 0   | 26S proteasome |
| YDL126C         | CDC48         | 0   | 1   | ATPase in ER   |
| YGR253C         | PUP2          | 0   | 1   | 20S proteasome |
| YHR027C         | RPN1          | 0   | 1   | 26S proteasome |
| YIL075C         | RPN2          | 0   | 1   | 26S proteasome |

**Table S4. Cytoplasmic ribosome complex. RPL represents Protein component of the large (60S) ribosomal subunit. RPS represents Protein component of the small (40S) ribosomal subunit**

| Systematic name | Standard name | FPT | SNB | Discription                |
|-----------------|---------------|-----|-----|----------------------------|
| YLR075W         | RPL10         | 1   | 1   | RPL                        |
| YPR102C         | RPL11A        | 1   | 1   | RPL                        |
| YGR085C         | RPL11B        | 1   | 1   | RPL                        |
| YEL054C         | RPL12A        | 1   | 1   | RPL                        |
| YDR418W         | RPL12B        | 1   | 1   | RPL                        |
| YKL006W         | RPL14A        | 1   | 1   | RPL                        |
| YLR029C         | RPL15A        | 1   | 1   | RPL                        |
| YIL133C         | RPL16A        | 1   | 1   | RPL                        |
| YKL180W         | RPL17A        | 1   | 1   | RPL                        |
| YOL120C         | RPL18A        | 1   | 1   | RPL                        |
| YBR084CA        | RPL19A        | 1   | 1   | RPL                        |
| YBL027W         | RPL19B        | 1   | 1   | RPL                        |
| YPL220W         | RPL1A         | 1   | 1   | RPL                        |
| YMR242C         | RPL20A        | 1   | 1   | RPL                        |
| YOR312C         | RPL20B        | 1   | 1   | RPL                        |
| YPL079W         | RPL21B        | 1   | 1   | RPL                        |
| YLR061W         | RPL22A        | 1   | 1   | RPL                        |
| YBL087C         | RPL23A        | 1   | 1   | RPL                        |
| YER117W         | RPL23B        | 1   | 1   | RPL                        |
| YGL031C         | RPL24A        | 1   | 1   | RPL                        |
| YGR148C         | RPL24B        | 1   | 1   | RPL                        |
| YOL127W         | RPL25         | 1   | 1   | RPL                        |
| YLR344W         | RPL26A        | 1   | 1   | RPL                        |
| YGR034W         | RPL26B        | 1   | 1   | RPL                        |
| YGL103W         | RPL28         | 1   | 1   | RPL                        |
| YIL018W         | RPL2B         | 1   | 1   | RPL                        |
| YGL030W         | RPL30         | 1   | 1   | RPL                        |
| YDL075W         | RPL31A        | 1   | 1   | RPL                        |
| YLR406C         | RPL31B        | 1   | 1   | RPL                        |
| YOR234C         | RPL33B        | 1   | 1   | RPL                        |
| YIL052C         | RPL34B        | 1   | 1   | RPL                        |
| YDL191W         | RPL35A        | 1   | 1   | RPL                        |
| YDL136W         | RPL35B        | 1   | 1   | RPL                        |
| YMR194W         | RPL36A        | 1   | 1   | RPL                        |
| YLR185W         | RPL37A        | 1   | 1   | RPL                        |
| YDR500C         | RPL37B        | 1   | 1   | RPL                        |
| YLR325C         | RPL38         | 1   | 1   | RPL                        |
| YIL148W         | RPL40A        | 1   | 1   | RPL                        |
| YKR094C         | RPL40B        | 1   | 1   | RPL                        |
| YNL162W         | RPL42A        | 1   | 1   | RPL                        |
| YHR141C         | RPL42B        | 1   | 1   | RPL                        |
| YJR094WA        | RPL43B        | 1   | 1   | RPL                        |
| YDR012W         | RPL4B         | 1   | 1   | RPL                        |
| YPL131W         | RPL5          | 1   | 1   | RPL                        |
| YML073C         | RPL6A         | 1   | 1   | RPL                        |
| YLR448W         | RPL6B         | 1   | 1   | RPL                        |
| YGL076C         | RPL7A         | 1   | 1   | RPL                        |
| YHL033C         | RPL8A         | 1   | 1   | RPL                        |
| YLL045C         | RPL8B         | 1   | 1   | RPL                        |
| YGL147C         | RPL9A         | 1   | 1   | RPL                        |
| YNL067W         | RPL9B         | 1   | 1   | RPL                        |
| YDL081C         | RPP1A         | 1   | 1   | Ribosomal Protein P1 Alpha |
| YOL039W         | RPP2A         | 1   | 1   | Ribosomal Protein P2 Alpha |
| YDR382W         | RPP2B         | 1   | 1   | Ribosomal Protein P2 Beta  |
| YGR214W         | RPS0A         | 1   | 1   | RPS                        |
| YLR048W         | RPS0B         | 1   | 1   | RPS                        |
| YOR293W         | RPS10A        | 1   | 1   | RPS                        |
| YMR230W         | RPS10B        | 1   | 1   | RPS                        |
| YDR025W         | RPS11A        | 1   | 1   | RPS                        |
| YBR048W         | RPS11B        | 1   | 1   | RPS                        |
| YOR369C         | RPS12         | 1   | 1   | RPS                        |
| YDR064W         | RPS13         | 1   | 1   | RPS                        |
| YCR031C         | RPS14A        | 1   | 1   | RPS                        |



| Systematic name | Standard name | FPT | SNB | Discription               |
|-----------------|---------------|-----|-----|---------------------------|
| YOL040C         | RPS15         | 1   | 1   | RPS                       |
| YML024W         | RPS17A        | 1   | 1   | RPS                       |
| YDR447C         | RPS17B        | 1   | 1   | RPS                       |
| YML026C         | RPS18B        | 1   | 1   | RPS                       |
| YOL121C         | RPS19A        | 1   | 1   | RPS                       |
| YNL302C         | RPS19B        | 1   | 1   | RPS                       |
| YLR441C         | RPS1A         | 1   | 1   | RPS                       |
| YML063W         | RPS1B         | 1   | 1   | RPS                       |
| YGL123W         | RPS2          | 1   | 1   | RPS                       |
| YHL015W         | RPS20         | 1   | 1   | RPS                       |
| YJL190C         | RPS22A        | 1   | 1   | RPS                       |
| YGR118W         | RPS23A        | 1   | 1   | RPS                       |
| YIL069C         | RPS24B        | 1   | 1   | RPS                       |
| YGR027C         | RPS25A        | 1   | 1   | RPS                       |
| YLR333C         | RPS25B        | 1   | 1   | RPS                       |
| YER131W         | RPS26B        | 1   | 1   | RPS                       |
| YKL156W         | RPS27A        | 1   | 1   | RPS                       |
| YOR167C         | RPS28A        | 1   | 1   | RPS                       |
| YLR264W         | RPS28B        | 1   | 1   | RPS                       |
| YLR388W         | RPS29A        | 1   | 1   | RPS                       |
| YDL061C         | RPS29B        | 1   | 1   | RPS                       |
| YNL178W         | RPS3          | 1   | 1   | RPS                       |
| YLR167W         | RPS31         | 1   | 1   | RPS                       |
| YJR145C         | RPS4A         | 1   | 1   | RPS                       |
| YHR203C         | RPS4B         | 1   | 1   | RPS                       |
| YJR123W         | RPS5          | 1   | 1   | RPS                       |
| YPL090C         | RPS6A         | 1   | 1   | RPS                       |
| YBR181C         | RPS6B         | 1   | 1   | RPS                       |
| YOR096W         | RPS7A         | 1   | 1   | RPS                       |
| YNL096C         | RPS7B         | 1   | 1   | RPS                       |
| YBL072C         | RPS8A         | 1   | 1   | RPS                       |
| YER102W         | RPS8B         | 1   | 1   | RPS                       |
| YBR189W         | RPS9B         | 1   | 1   | RPS                       |
| YDL208W         | NHP2          | 1   | 0   | rRNA processing           |
| YDL082W         | RPL13A        | 1   | 0   | RPL                       |
| YMR142C         | RPL13B        | 1   | 0   | RPL                       |
| YHL001W         | RPL14B        | 1   | 0   | RPL                       |
| YMR121C         | RPL15B        | 1   | 0   | RPL                       |
| YNL069C         | RPL16B        | 1   | 0   | RPL                       |
| YNL301C         | RPL18B        | 1   | 0   | RPL                       |
| YGL135W         | RPL1B         | 1   | 0   | RPL                       |
| YBR191W         | RPL21A        | 1   | 0   | RPL                       |
| YHR010W         | RPL27A        | 1   | 0   | RPL                       |
| YDR471W         | RPL27B        | 1   | 0   | RPL                       |
| YFR032CA        | RPL29         | 1   | 0   | RPL                       |
| YFR031CA        | RPL2A         | 1   | 0   | RPL                       |
| YOR063W         | RPL3          | 1   | 0   | RPL                       |
| YPL143W         | RPL33A        | 1   | 0   | RPL                       |
| YPL249CA        | RPL36B        | 1   | 0   | RPL                       |
| YBR031W         | RPL4A         | 1   | 0   | RPL                       |
| YDL130W         | RPP1B         | 1   | 0   | Ribosomal Protein P1 Beta |
| YJL191W         | RPS14B        | 1   | 0   | RPS                       |
| YDL083C         | RPS16B        | 1   | 0   | RPS                       |
| YDR450W         | RPS18A        | 1   | 0   | RPS                       |
| YKR057W         | RPS21A        | 1   | 0   | RPS                       |
| YLR367W         | RPS22B        | 1   | 0   | RPS                       |
| YPR132W         | RPS23B        | 1   | 0   | RPS                       |
| YLR287CA        | RPS30A        | 1   | 0   | RPS                       |
| YPL081W         | RPS9A         | 1   | 0   | RPS                       |
| YHR010W         | RPL27A        | 0   | 1   | RPL                       |
| YLR340W         | RPP0          | 0   | 1   | ribosomal protein P0      |

Table S5. New complex

| Systematic name | Standard name | FPT | SNB | Description                 |
|-----------------|---------------|-----|-----|-----------------------------|
| YLR298C         | YHC1          | 1   | 0   | U1 snRNP                    |
| YGR013W         | SNU71         | 1   | 0   | U1 snRNP                    |
| YIL061C         | SNP1          | 1   | 0   | U1 snRNP                    |
| YDR240C         | SNU56         | 1   | 0   | U1 snRNP                    |
| YBL074C         | AAR2          | 1   | 0   | U5 snRNP                    |
| YER029C         | SMB1          | 1   | 0   | Sm B                        |
| YGR074W         | SMD1          | 1   | 0   | Sm D1                       |
| YLR275W         | SMD2          | 1   | 0   | Sm D2                       |
| YLR147C         | SMD3          | 1   | 0   | Sm D3                       |
| YOR159C         | SME1          | 1   | 0   | Sm E                        |
| YPR182W         | SMX3          | 1   | 0   | Sm F                        |
| YMR213W         | CEF1          | 1   | 0   | splicing factor             |
| YLR117C         | CLF1          | 1   | 0   | spliceosome assembly factor |
| YKL173W         | SNU114        | 1   | 0   | U5 snRNP                    |
| YMR125W         | STO1          | 1   | 0   | nuclear mRNA degradation    |
| YBL026W         | LSM2          | 1   | 0   | Sm-like protein             |
| YER112W         | LSM4          | 1   | 0   | Sm-like                     |
| YBR055C         | PRP6          | 1   | 0   | pre-mRNA processing         |
| YDL030W         | PRP9          | 1   | 0   | pre-mRNA processing         |
| YDL043C         | PRP11         | 1   | 0   | pre-mRNA processing         |
| YMR268C         | PRP24         | 1   | 0   | pre-mRNA processing         |
| YDR473C         | PRP3          | 1   | 0   | pre-mRNA processing         |
| YPR178W         | PRP4          | 1   | 0   | pre-mRNA processing         |
| YML046W         | PRP39         | 1   | 0   | pre-mRNA processing         |
| YDR243C         | PRP28         | 1   | 0   | Pre-mRNA Processing         |
| YGL120C         | PRP43         | 1   | 0   | Pre-mRNA Processing         |
| YGR006W         | PRP18         | 1   | 0   | Pre-mRNA Processing         |
| YGR075C         | PRP38         | 1   | 0   | Pre-mRNA Processing         |
| YGR091W         | PRP31         | 1   | 0   | Pre-mRNA Processing         |
| YHR165C         | PRP8          | 1   | 0   | Pre-mRNA Processing         |
| YJL203W         | PRP21         | 1   | 0   | Pre-mRNA Processing         |
| YKL012W         | PRP40         | 1   | 0   | Pre-mRNA Processing         |
| YLL036C         | PRP19         | 1   | 0   | Pre-mRNA Processing         |
| YDR235W         | PRP42         | 1   | 0   | U1 snRNP                    |
| YML049C         | RSE1          | 1   | 0   | pre-mRNA splicing           |
| YMR240C         | CUS1          | 1   | 0   | U2 snRNP                    |
| YHR086W         | NAM8          | 1   | 0   | U1 snRNP                    |
| YDR088C         | SLU7          | 1   | 0   | RNA splicing factor         |
| YPR057W         | BRR1          | 1   | 0   | pre-mRNA splicing           |
| YBR119W         | MUD1          | 1   | 0   | U1 snRNP                    |
| YOR319W         | HSH49         | 1   | 0   | U2-snRNP                    |
| YIR009W         | MSL1          | 1   | 0   | U2 snRNP                    |
